# Supplementary material
Source: PubMed Central journal article supplement (PMC2555978)

CALRETININ

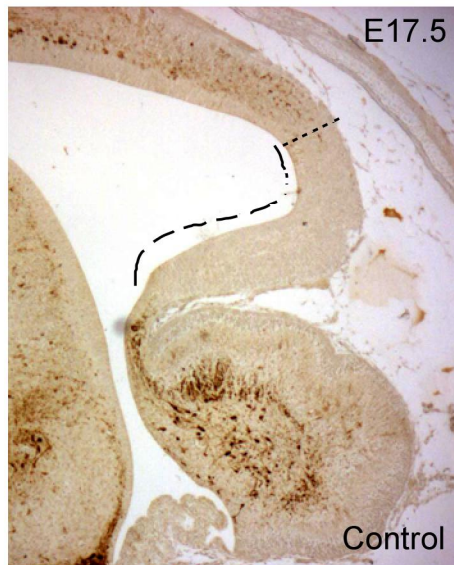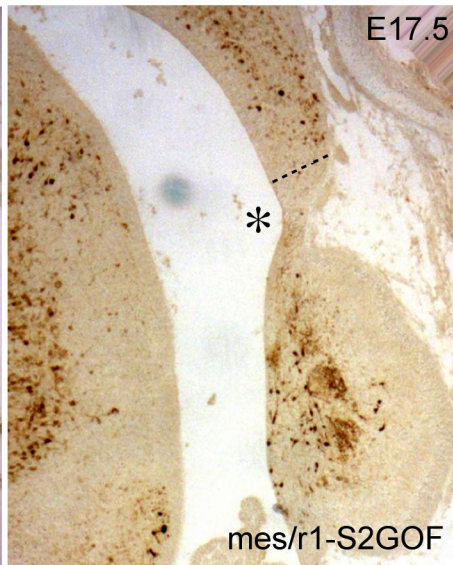

Supplement: NIHMS2187-supplement-2.pdf [file NIHMS2187-supplement-2.pdf]
